# Supplementary material
Source: publisher site journal article supplement (https://www.dovepress.com/article/225444)
Supplement: Supplementary file 1 [file get_supplementary_file.php]

**Table 1 Demographic characteristics, prescribing pattern, and first line therapeutic approach of the cohort of 18,504 incident antihypertensive users**

|                                        | <b>Total Cohort 18,504<br/>N (%)</b> |
|----------------------------------------|--------------------------------------|
| <b>Male</b>                            | 8,297 (44.8)                         |
| <b>Age group</b>                       |                                      |
| < 40 years                             | 1,667 (9.0)                          |
| 40 – 49 years                          | 3,554 (19.2)                         |
| 50 – 59 years                          | 4,794 (25.9)                         |
| 60 – 69 years                          | 4,259 (23.0)                         |
| 70 – 79 years                          | 2,731 (14.8)                         |
| ≥ 80 years                             | 1,499 (8.1)                          |
| <b>Blood pressure (Mean ± DS)</b>      |                                      |
| Systolic blood pressure                | 87±11.1                              |
| Diastolic blood pressure               | 143±18.7                             |
| <b>Comedications</b>                   |                                      |
| Antidiabetics (ATC: A10)               | 1,881 (10.2)                         |
| Antihyperlipidemics (ATC: C10)         | 4,474 (24.2)                         |
| Antiplatelets (ATC: B01AC)             | 4,027 (21.8)                         |
| <b>Cardiovascular disease</b>          |                                      |
| Acute Myocardial Infarction (IMA)      | 869 (4.7)                            |
| Congestive heart failure               | 105 (0.6)                            |
| Cerebrovascular disease                | 620 (3.4)                            |
| <b>First line therapeutic approach</b> |                                      |
| Monotherapy                            | 12,404 (67.0)                        |
| ACE inhibitors                         | 3,897 (31.4%)                        |
| Beta blockers                          | 3,203 (25.8%)                        |
| Diuretics                              | 2,243 (18.1%)                        |
| ARBs                                   | 1,985 (16.0%)                        |
| CCBs                                   | 1,076 (8.7%)                         |
| Combination therapy                    | 6,100 (33.0)                         |
| Free combinations                      | 1,642 (26.9%)                        |
| Fixed dose combinations                | 3,659 (60.0%)                        |
| Multiple mix                           | 799 (13.1%)                          |
| <b>Prescription patterns</b>           |                                      |
| Continuers                             | 3,578 (19.3)                         |
| Add – on                               | 1,596 (8.6)                          |
| Switchers                              | 3,740 (20.2)                         |
| Discontinuers                          | 9,590 (51.8)                         |

**Table 2 Variables that influence the incidence rate of non-persistence to antihypertensive drugs**

| <b>Characteristics</b>             | <b>Unadjusted HR (95% CI)</b> | <b>p-value</b> | <b>Adjusted HR (95% CI)</b> | <b>p-value</b> |
|------------------------------------|-------------------------------|----------------|-----------------------------|----------------|
| <b>Sex</b>                         |                               |                |                             |                |
| Female                             | Reference                     |                |                             |                |
| Male                               | 0.85 (0.82-0.90)              | <0.001         | 0.86 (0.83-0.90)            | <0.001         |
| <b>Age-group</b>                   |                               |                |                             |                |
| < 40 years                         | Reference                     |                |                             |                |
| 40-49 years                        | 0.70 (0.65-0.76)              | <0.001         | 0.74 (0.69-0.80)            | <0.001         |
| 50-59 years                        | 0.64 (0.60-0.69)              | <0.001         | 0.71 (0.66-0.76)            | <0.001         |
| 60-69 years                        | 0.54 (0.51-0.58)              | <0.001         | 0.64 (0.59-0.69)            | <0.001         |
| 70-79 years                        | 0.49 (0.46-0.54)              | <0.001         | 0.62 (0.57-0.67)            | <0.001         |
| ≥80 years                          | 0.52 (0.48-0.58)              | <0.001         | 0.68 (0.62-0.75)            | <0.001         |
| <b>Drug Therapy</b>                |                               |                |                             |                |
| Monotherapy                        | Reference                     |                |                             |                |
| Free combination                   | 0.67 (0.62-0.73)              | <0.001         | 0.83 (0.77-0.90)            | <0.001         |
| Fixed combination                  | 0.58 (0.54-0.61)              | <0.001         | 0.57 (0.54-0.61)            | <0.001         |
| <b>Comedications</b>               |                               |                |                             |                |
| <b>Antidiabetics</b>               |                               |                |                             |                |
| No                                 | Reference                     |                |                             |                |
| Yes                                | 0.70 (0.65-0.76)              | <0.001         | 0.89 (0.83-0.97)            | 0.004          |
| <b>Anthyperlipidemics</b>          |                               |                |                             |                |
| No                                 | Reference                     |                |                             |                |
| Yes                                | 0.65 (0.62-0.68)              | <0.001         | 0.83 (0.78-0.88)            | <0.001         |
| <b>Antiplatelets</b>               |                               |                |                             |                |
| No                                 | Reference                     |                |                             |                |
| Yes                                | 0.58 (0.55-0.61)              | <0.001         | 0.75 (0.71-0.80)            | <0.001         |
| <b>Acute Myocardial Infarction</b> |                               |                |                             |                |
| No                                 | Reference                     |                |                             |                |
| Yes                                | 0.43 (0.38-0.49)              | <0.001         | 0.63 (0.55-0.72)            | <0.001         |
| <b>Cerebrovascular disease</b>     |                               |                |                             |                |
| No                                 | Reference                     |                |                             |                |
| Yes                                | 0.50 (0.43-0.58)              | <0.001         | 0.67 (0.57-0.78)            | <0.001         |
| <b>Congestive Heart Failure</b>    |                               |                |                             |                |
| No                                 | Reference                     |                |                             |                |
| Yes                                | 0.41 (0.28-0.60)              |                | 0.52 (0.35-0.76)            | 0.001          |

\* Adjusted for all covariates.

## Appendix 1 Free and fixed combination – Definition

| ATC                                                                                          | Description                                             |
|----------------------------------------------------------------------------------------------|---------------------------------------------------------|
| <b>Fixed combination 1 drug belonging to following ATC group</b>                             |                                                         |
| C09BA                                                                                        | ACE Inhibitors And Diuretics                            |
| C09BB                                                                                        | ACE Inhibitors And Calcium Channel Blockers             |
| C09DA                                                                                        | Angiotensin II Antagonists And Diuretics                |
| C09DB                                                                                        | Angiotensin II Antagonists And Calcium Channel Blockers |
| C07BB                                                                                        | Beta blocking agents, selective, and thiazides          |
| C07CB                                                                                        | Beta blocking agents, selective, and other diuretics    |
| C07FB                                                                                        | Beta blocking agents and calcium channel blockers       |
| <b>Free combination <math>\geq</math> 2 different drugs belonging to following ATC group</b> |                                                         |
| C03                                                                                          | Diuretics                                               |
| C07                                                                                          | Beta Blocking Agents                                    |
| C08                                                                                          | Calcium Channel Beta Blockers                           |
| C09AA                                                                                        | ACE Inhibitors, Plain                                   |
| C09CA                                                                                        | Angiotensin II Antagonists, Plain                       |
